# Supplementary material for: 18.73% efficiency organic solar cells with a medium bandgap acceptor as a third component
Source: Royal Society of Chemistry journal article supplement (doi:10.1039/d3ta03836j), 2023-01-01
Supplement: d3ta03836j1.pdf [file d3ta03836j1.pdf]

## Supporting Information

### 18.73% Efficiency Ternary Organic Solar Cells with a Medium Bandgap Acceptor as a Third Component

Zheling Zhang<sup>a,b</sup>, Yang Zhang<sup>b</sup>, Zhenqi Deng<sup>b</sup>, Tianhuan Huang<sup>b</sup>, Dongjie Wang<sup>b</sup>, Xiaoling Zhang<sup>a,\*</sup>, Qiaogan Liao<sup>b,\*</sup>, Jian Zhang<sup>b</sup>

<sup>a</sup> Key Laboratory of Cluster Science of Ministry of Education, Beijing Key Laboratory of Photoelectronic/Electrophotonic Conversion Materials, Analytical and Testing Center, School of Chemistry and Chemical Engineering, Beijing Institute of Technology, Beijing 100081, P. R. China

<sup>b</sup> School of Materials Science and Engineering, Engineering Research Center of Electronic Information Materials and Devices, Ministry of Education, Guangxi Key Laboratory of Information Materials, Guilin University of Electronic Technology, 1st Jinji Road, Guilin, 541004, China.

\*Corresponding author

E-mail: [zhangxl@bit.edu.cn](mailto:zhangxl@bit.edu.cn), [liaofeixue@163.com](mailto:liaofeixue@163.com)

Keywords: ternary organic solar cells, high-efficiency, alloy, molecular arrangement, phase separation

#### Experimental Section

*Materials:* PM6, IT-M, BTP-eC9, and PFN-Br were purchased from Solarmer Materials (Beijing) Inc. The processing solvents used in the device fabrication processes were purchased from Sigma Aldrich without further purification. PEDOT:PSS (clevis P VP Al 4083) was purchased from H. C. Starck co. Ltd.

*Device fabrication:* The conventional OSCs with a device architecture of ITO/PEDOT:PSS/Active layer/PFN-Br/Al. Patterned ITO-glass substrates were used as the anode in OSCs. The PEDOT:PSS solutions were spin-coated on the pre-cleaned ITO glass substrates with a spin rate of 5000 rpm for 45 s and then annealed on a hot plate at 150 °C for 15 min in air to

obtain uniform films. The concentration of PM6:IT-M:BTP-eC9 with various ratio IT-M in PM6 dissolve in chlorobenzene (CB) solution is  $22 \text{ mg mL}^{-1}$  and stirred at room temperature for over 3 h and 0.5 vol% 1,8-diiodooctane was added as the additive. The weight ratio of donor:acceptor in OSCs was kept at 1:1.2. The blend solutions were spin-coated onto the ITO/PEDOT:PSS substrates at 3000 rpm for 40 s. The active layers were thermally annealed at  $100 \text{ }^{\circ}\text{C}$  for 5 min. PFN-Br was dissolved in methanol with the addition of 0.25 vol% acetic acid to prepare a  $2 \text{ mg mL}^{-1}$  solution. The prepared PFN-Br solution was spin-coated onto the active layers at 5000 rpm for 30 s. Finally, aluminum (Al) electrode was deposited by thermal evaporation. For each of the organic solar cells (OSCs), the contacts were deposited at the vacuum condition of  $10^{-4} \text{ Pa}$ . The active area is defined as  $4.00 \text{ mm}^2$  with a mask.

*Characterization:* The current density-voltage ( $J$ - $V$ ) characteristics of the solar cells were investigated using a solar simulator (SS-F5-3A, Enlitech) under illumination power of  $100 \text{ mW cm}^{-2}$  along with AM 1.5G spectra. The light intensity was calibrated by a certified standard silicon solar cell (SRC-2020, Enlitech). The external quantum efficiency (EQE) was characterized by using the solar cell spectral response measurement system (QE-R, Enlitech). Atomic force microscopy (AFM) images were recorded on a Dimension 3100 system (Digital Instruments/Veeco) in tapping mode. The electrochemical impedance spectroscopy (EIS) Nyquist plots were acquired on the CHI660E electrochemical workstation (CH Instruments, Inc.) in the frequency range from 10 Hz to 1 MHz under dark conditions.

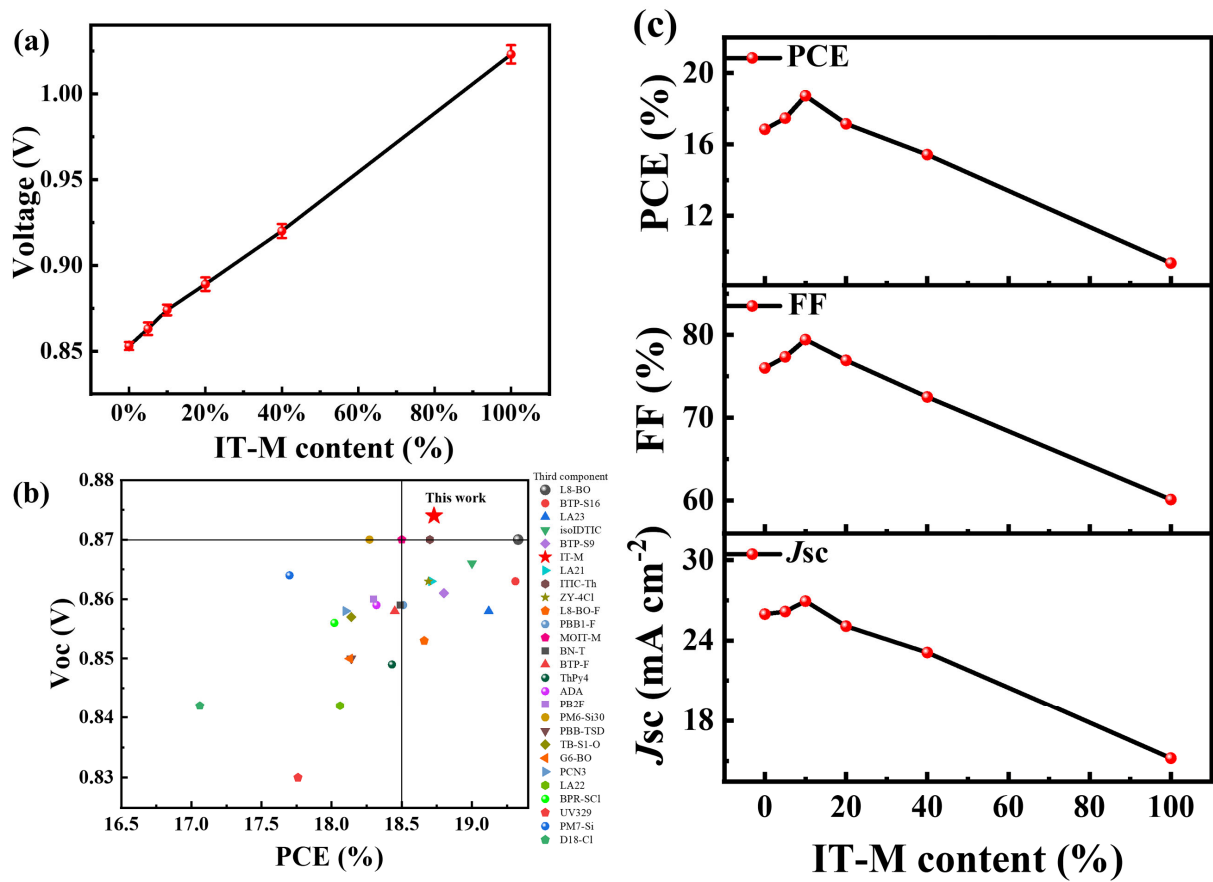

**Figure S1.** (a)  $V_{oc}$  dependence on the IT-M content. (b) Comparison of the  $V_{oc}$  of recently reported PM6:BTP-eC9-based ternary OSCs and this work with references listed in Table S4. (c) The  $J_{sc}$ , FF and PCE with different IT-M content.

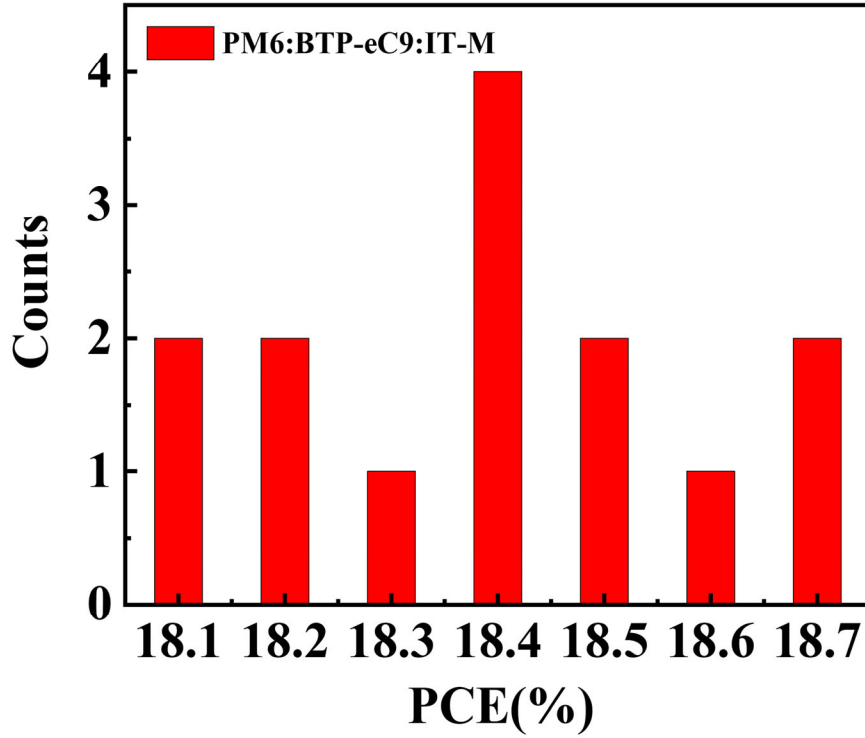

**Figure S2.** The statistical histograms of PCE distribution for the optimized TOSCs with 10 wt% IT-M in acceptors.

**Table S1.** Key parameters of the binary and ternary OSCs.

| IT-M content | $J_{\text{sat}}$<br>[mA cm <sup>-2</sup> ] | $J_{\text{ph}}^*$<br>[mA cm <sup>-2</sup> ] | $J_{\text{ph}}^{\&}$<br>[mA cm <sup>-2</sup> ] | $J_{\text{ph}}^* / J_{\text{sat}}$<br>[%] | $J_{\text{ph}}^{\&} / J_{\text{sat}}$<br>[%] | $J_{\text{ph}}^* / J_{\text{ph}}^{\&}$ |
|--------------|--------------------------------------------|---------------------------------------------|------------------------------------------------|-------------------------------------------|----------------------------------------------|----------------------------------------|
| 0%           | 26.837                                     | 25.98                                       | 23.73                                          | 96.8                                      | 88.4                                         | 1.095                                  |
| 10%          | 27.404                                     | 26.95                                       | 24.97                                          | 98.3                                      | 91.1                                         | 1.079                                  |
| 100%         | 16.769                                     | 15.21                                       | 11.98                                          | 90.7                                      | 71.4                                         | 1.269                                  |

$J_{\text{sat}}$ : The  $J_{\text{ph}}$  under condition of  $V_{\text{eff}}=4$  V.

$J_{\text{ph}}^*$ : The  $J_{\text{ph}}$  under short circuit conditions.

$J_{\text{ph}}^{\&}$ : The  $J_{\text{ph}}$  under maximum power output conditions.

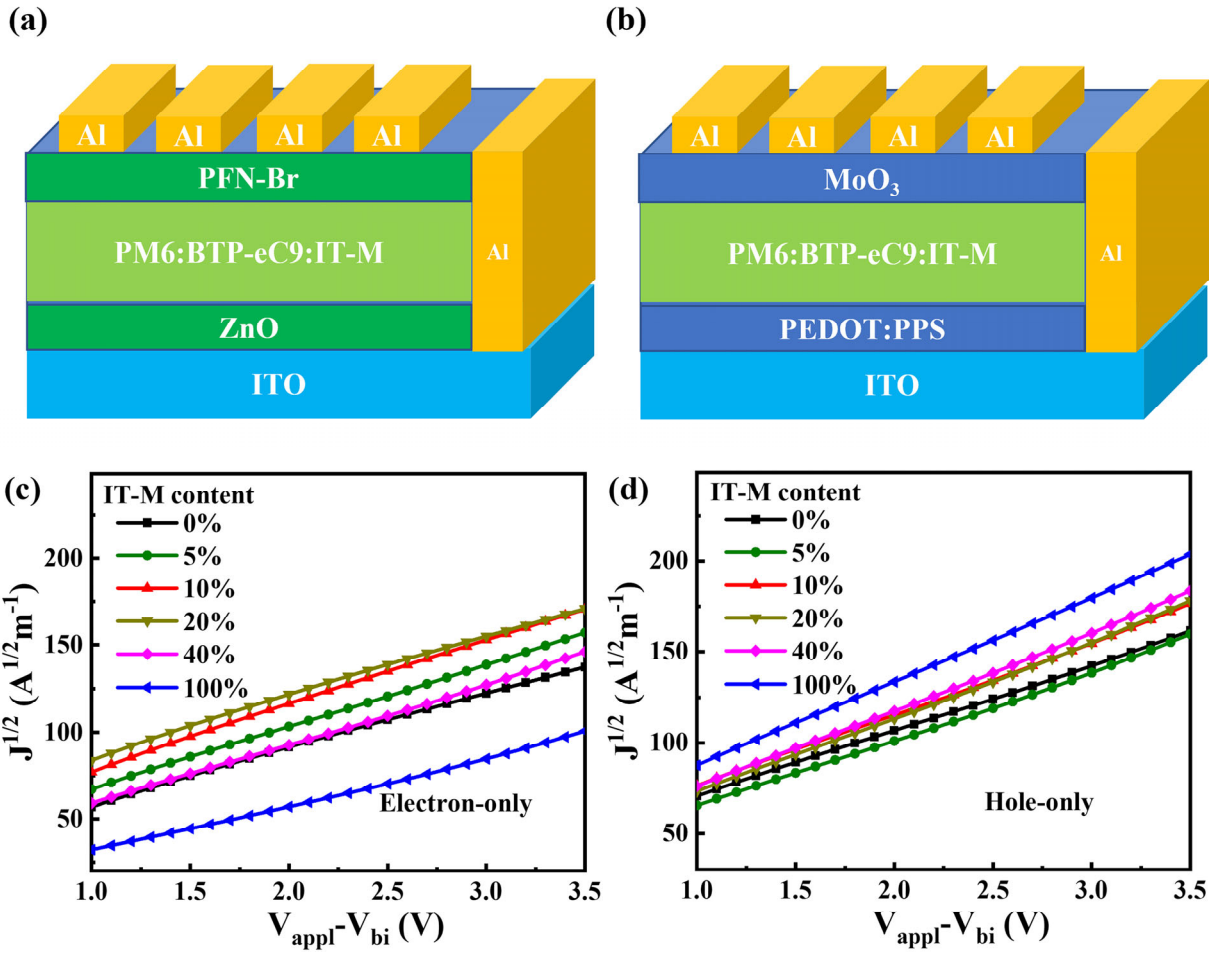

**Figure S3.** (a-b) schematic diagram of the hole-only, electron-only device structure. (c-d)  $J^{1/2} - V$  plots of electron-only and hole-only devices

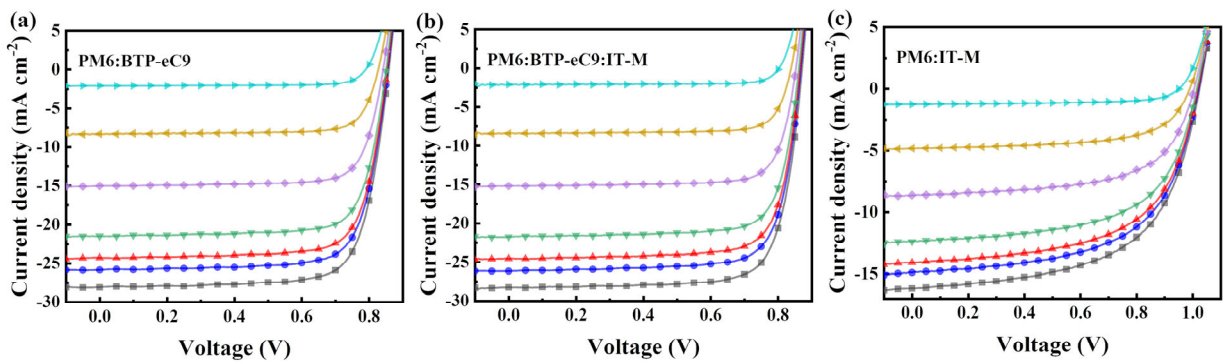

**Figure S4.** (a-c) The  $J-V$  curves of the binary and optimized ternary OSCs under different light illumination intensity, obtained from standard AM 1.5G (100 mW cm<sup>-2</sup>) illumination using a set of neutral optical filters.

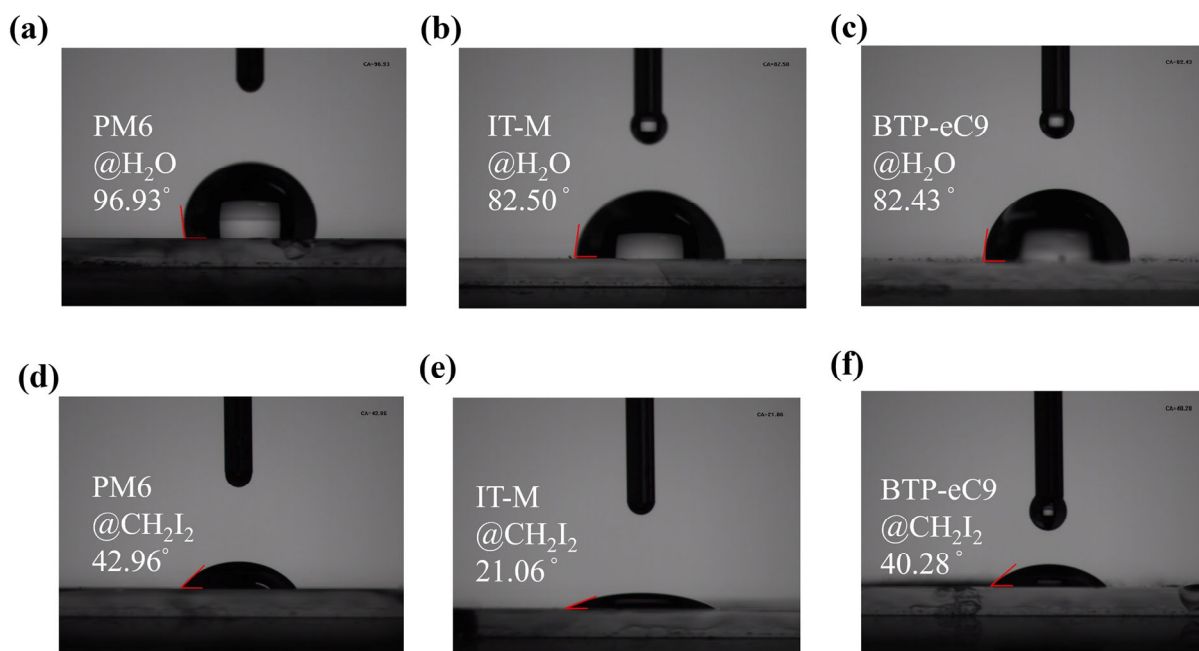

**Figure S6.** Contact angle images of neat PM6, IT-M, and BTP-eC9 films with H<sub>2</sub>O (a-c) and CH<sub>2</sub>I<sub>2</sub> (d-f) on top.

**Table S3.** Contact angle, surface tension and interfacial tension ( $\gamma$ ) of individual materials.

| Materials | H <sub>2</sub> O<br>(°) | CH <sub>2</sub> I <sub>2</sub><br>(°) | Surface<br>(mN/m) | $\gamma^d$<br>(mN/m) | $\gamma^p$<br>(mN/m) | $\gamma_{X:BTP-eC9}$<br>(mN/m) | $\gamma_{X:IT-M}$<br>(mN/m) |
|-----------|-------------------------|---------------------------------------|-------------------|----------------------|----------------------|--------------------------------|-----------------------------|
| PM6       | 96.93                   | 42.96                                 | 32.3              | 31.73                | 0.63                 | 3.46                           | 2.06                        |
| BTP-ec9   | 82.43                   | 40.28                                 | 34.1              | 29.09                | 5.02                 | ----                           | 1.33                        |
| IT-M      | 82.50                   | 21.06                                 | 40.1              | 36.89                | 3.20                 | 1.33                           | ----                        |

**Table S4.** Comparison of the  $V_{OC}$  of recently reported PM6:BTP-eC9-based ternary OSCs and this work

| Third component | $V_{OC}$ (V) | $J_{sc}$ (mA cm <sup>-2</sup> ) | FF (%) | PCE (%) | reference |
|-----------------|--------------|---------------------------------|--------|---------|-----------|
| PBB-TSD         | 0.850        | 26.86                           | 79.48  | 18.14   | 1         |
| ITIC-Th         | 0.87         | 28.0                            | 77.0   | 18.7    | 2         |
| G6-BO           | 0.85         | 27.6                            | 77.67  | 18.13   | 3         |
| UV329           | 0.83         | 27.81                           | 76.84  | 17.76   | 4         |
| isoIDTIC        | 0.866        | 27.30                           | 80.4   | 19.0    | 5         |
| BTP-S9          | 0.861        | 27.50                           | 79.34  | 18.8    | 6         |
| MOIT-M          | 0.87         | 27.4                            | 77.3   | 18.5    | 7         |
| PBB1-F          | 0.859        | 27.44                           | 78.51  | 18.51   | 8         |
| PM6-Si30        | 0.870        | 26.90                           | 78.40  | 18.27   | 9         |
| BN-T            | 0.859        | 26.84                           | 80.2   | 18.49   | 10        |
| ThPy4           | 0.849        | 27.08                           | 80.2   | 18.43   | 11        |
| BTP-S2          | 0.878        | 26.78                           | 79.44  | 18.66   | 12        |
| PTO2            | 0.90         | 27.09                           | 73.28  | 18.01   | 13        |
| ZY-4Cl          | 0.863        | 27.40                           | 79.0   | 18.69   | 14        |
| ADA             | 0.859        | 27.58                           | 77.34  | 18.32   | 15        |
| PB2F            | 0.860        | 26.6                            | 79.9   | 18.3    | 16        |
| PM7-Si          | 0.864        | 26.35                           | 77.6   | 17.7    | 17        |
| BTP-F           | 0.858        | 26.99                           | 79.7   | 18.45   | 18        |
| BPR-SCl         | 0.856        | 27.13                           | 77.6   | 18.02   | 19        |
| L8-BO-F         | 0.853        | 27.35                           | 80.0   | 18.66   | 20        |
| TB-S1-O         | 0.857        | 27.40                           | 77.2   | 18.14   | 21        |
| PCN3            | 0.858        | 26.90                           | 78.20  | 18.10   | 22        |
| BTP-ICBCF3      | 0.853        | 27.4                            | 77.8   | 18.2    | 23        |
| D18-Cl          | 0.842        | 25.99                           | 77.95  | 17.06   | 24        |
| LA23            | 0.858        | 28.03                           | 79.50  | 19.12   | 25        |
| LA21            | 0.863        | 27.79                           | 78.00  | 18.71   | 25        |
| LA22            | 0.842        | 27.51                           | 77.98  | 18.06   | 25        |
| L8-BO           | 0.87         | 28.57                           | 77.92  | 19.33   | 26        |
| BTP-S16         | 0.863        | 27.73                           | 80.64  | 19.31   | 27        |
| BTP-S17         | 0.873        | 27.59                           | 79.55  | 19.19   | 27        |

## References

1. J. J. Wang, S. G. Wen, J. Hu, J. H. Han, C. P. Yang, J. F. Li, X. C. Bao and S. K. Yan, *Chem. Eng. J.*, 2023, 452, 9, 139462.
2. T. H. Huang, Z. L. Zhang, D. J. Wang, Y. Zhang, Z. Q. Deng, Y. Huang, Q. G. Liao and J. Zhang, *ACS Appl. Energ. Mater.*, 2023, 6, 3126-3134.
3. Y. T. Guo, Z. Y. Chen, J. F. Ge, J. N. Zhang, L. Xie, R. X. Peng, W. Ma and Z. Y. Ge, *Sci. China-Chem.*, 2023, 66, 500-507.
4. Y. J. Cui, Z. Chen, P. P. Zhu, W. Ma, H. M. Zhu, X. F. Liao and Y. W. Chen, *Sci. China-Chem.*, 2023, 66, 1179-1189.
5. H. Chen, S. Y. Jeong, J. F. Tian, Y. D. Zhang, D. R. Naphade, M. Alsufyani, W. M. Zhang, S. Griggs, H. L. Hu, S. Barlow, H. Y. Woo, S. R. Marder, T. D. Anthopoulos, I. McCulloch and Y. B. Lin, *Energy Environ. Sci.*, 2023, 16, 1062-1070.
6. L. L. Zhan, S. X. Li, Y. K. Li, R. Sun, J. Min, Z. Z. Bi, W. Ma, Z. Chen, G. Q. Zhou, H. M. Zhu, M. M. Shi, L. J. Zuo and H. Z. Chen, *Joule*, 2022, 6, 662-675.
7. X. Yan, J. N. Wu, J. F. Lv, L. Zhang, R. Zhang, X. Guo and M. J. Zhang, *J. Mater. Chem. A*, 2022, 10, 15605-15613.
8. J. X. Wang, C. Y. Han, J. H. Han, F. Z. Bi, X. K. Sun, S. G. Wen, C. P. Yang, C. M. Yang, X. C. Bao and J. H. Chu, *Adv. Energy Mater.*, 2022, 12, 10.
9. W. H. Peng, Y. B. Lin, S. Y. Jeong, Z. Genene, A. Magomedov, H. Y. Woo, C. L. Chen, W. Wahyudi, Q. Tao, J. Y. Deng, Y. Han, V. Getautis, W. G. Zhu, T. D. Anthopoulos and E. G. Wang, *Nano Energy*, 2022, 92, 8.
10. R. J. Ma, C. Q. Yan, P. W. K. Fong, J. S. Yu, H. Liu, J. L. Yin, J. H. Huang, X. H. Lu, H. Yan and G. Li, *Energy Environ. Sci.*, 2022, 15, 2479-2488.
11. Z. H. Luo, R. J. Ma, J. W. Yu, H. Liu, T. Liu, F. Ni, J. H. Hu, Y. Zou, A. P. Zeng, C. J. Su, U. S. Jeng, X. H. Lu, F. Gao, C. L. Yang and H. Yan, *Natl. Sci. Rev.*, 2022, 9, 10.
12. Y. K. Li, Y. Guo, Z. Chen, L. L. Zhan, C. L. He, Z. Z. Bi, N. N. Yao, S. X. Li, G. Q. Zhou, Y. P. Yi, Y. Yang, H. M. Zhu, W. Ma, F. Gao, F. L. Zhang, L. J. Zuo and H. Z. Chen, *Energy Environ. Sci.*, 2022, 15, 855-865.
13. B. H. Jiang, Y. J. Peng, Y. W. Su, J. F. Chang, C. C. Chueh, T. S. Shieh, C. I. Huang and C. P. Chen, *Chem. Eng. J.*, 2022, 431, 11.
14. X. P. Duan, W. Song, J. W. Qiao, X. M. Li, Y. H. Cai, H. B. Wu, J. Zhang, X. T. Hao, Z. Tang, Z. Y. Ge, F. Huang and Y. M. Sun, *Energy Environ. Sci.*, 2022, 15, 1563-1572.
15. Y. J. Cheng, B. Huang, X. X. Huang, L. F. Zhang, S. Kim, Q. Xie, C. Liu, T. Heumuller, Z. J. Liu, Y. H. Zhang, F. Y. Wu, C. Yang, C. J. Brabec, Y. W. Chen and L. Chen, *Angew. Chem.-Int. Edit.*, 2022, 61, 12.
16. T. Zhang, C. B. An, P. Q. Bi, Q. L. Lv, J. Z. Qin, L. Hong, Y. Cui, S. Q. Zhang and J. H. Hou, *Adv. Energy Mater.*, 2021, 11, 8.
17. W. H. Peng, Y. B. Lin, S. Y. Jeong, Y. Firdaus, Z. Genene, A. Nikitaras, L. Tsetseris, H. Y. Woo, W. G. Zhu, T. D. Anthopoulos and E. G. Wang, *Chem. Mater.*, 2021, 33, 7254-7262.
18. Y. Li, Y. H. Cai, Y. P. Xie, J. H. Song, H. B. Wu, Z. Tang, J. Zhang, F. Huang and Y. M. Sun, *Energy Environ. Sci.*, 2021, 14, 5009-5016.
19. X. J. Chen, D. Wang, Z. K. Wang, Y. H. Li, H. M. Zhu, X. H. Lu, W. Z. Chen, H. Y. Qiu and Q. Zhang, *Chem. Eng. J.*, 2021, 424, 6.
20. Y. H. Cai, Y. Li, R. Wang, H. B. Wu, Z. H. Chen, J. Zhang, Z. F. Ma, X. T. Hao, Y. Zhao, C. F. Zhang, F. Huang and Y. M. Sun, *Adv. Mater.*, 2021, 33, 9.
21. L. Xie, A. Lan, Q. Gu, S. C. Yang, W. Song, J. F. Ge, R. Zhou, Z. Y. Chen, J. Q. Zhang, X. L. Zhang, D. B. Yang, B. C. Tang, T. Wu and Z. Y. Ge, *Acs Energy Letters*, 2023, 8, 361-371.
22. L. Wang, L. F. Zhang, S. Kim, T. T. Wang, Z. Y. Yuan, C. Yang, Y. Hu, X. H. Zhao and Y. W. Chen, *Small*, 2023, 19, 2206607.
23. Y. A. Shi, L. Y. Zhu, Y. J. Yan, M. L. Xie, G. Liang, J. W. Qiao, J. Q. Zhang, X. T. Hao, K. Lu and Z. X. Wei, *Adv. Energy Mater.*, 2023, 2300458.
24. J. H. Kim, Y. C. Kim, J. Y. Kim, H. S. Lee, Y. W. Han, H. W. Lee and D. K. Moon, *Small Structures*, 2023, 2300057.
25. C. Y. Han, J. X. Wang, S. Zhang, L. L. Chen, F. Z. Bi, J. J. Wang, C. M. Yang, P. C. Wang, Y. H. Li and X. C. Bao, *Adv. Mater.*, 2023, 35, 2208986.
26. M. Deng, X. P. Xu, Y. W. Duan, L. Y. Yu, R. P. Li and Q. Peng, *Adv. Mater.*, 2023, 35, 2210760.



27. T. Y. Chen, S. X. Li, Y. K. Li, Z. Chen, H. T. Wu, Y. Lin, Y. Gao, M. T. Wang, G. Y. Ding, J. Min, Z. F. Ma, H. M. Zhu, L. J. Zuo and H. Z. Chen, *Adv. Mater.*, 2023, 2300400.
